# Supplementary material
Source: Springer Nature journal article supplement (https://www.springermedizin.de/resource/supplementary/13024_2010_171_MOESM4_ESM.pdf/9643576)

### PS1/2dko Cells (Stable expression)

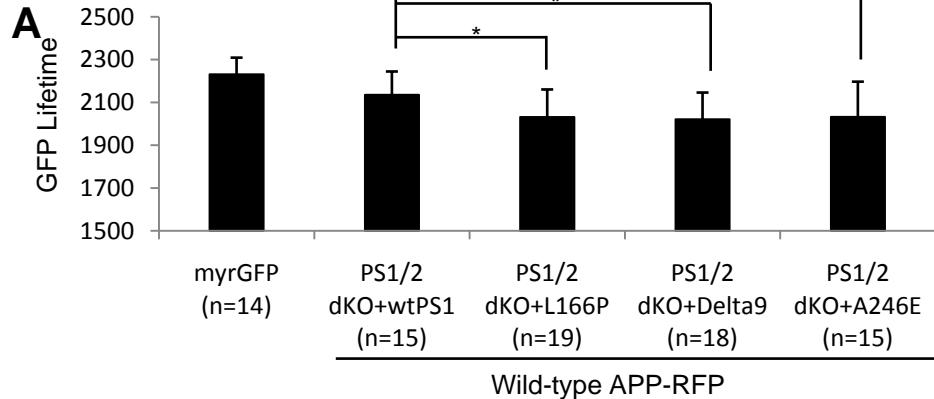

### PS1/2dko Cells (Transient expression)

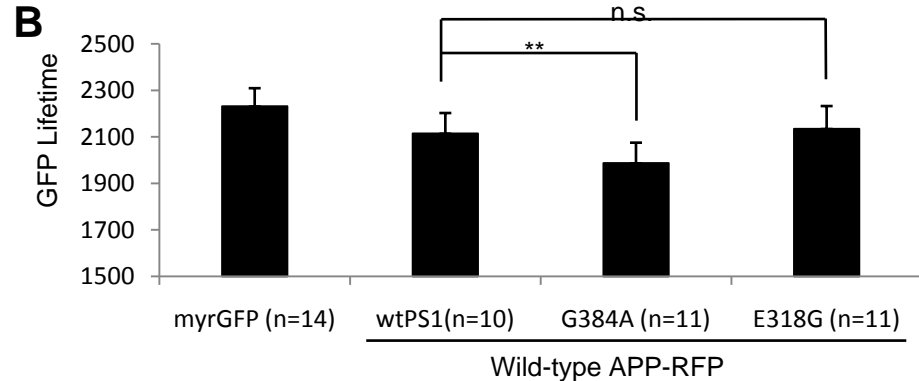

Supplement: MOESM4 [file 9643576]
